# Supplementary material for: Do young dating app users and non-users differ in mating orientations?
Source: PubMed Central journal article supplement (PMC7853474; doi:10.1371/journal.pone.0246350), 2021-02-02
Supplement: pone.0246350.s001.pdf [file pone.0246350.s001.pdf]

# S1 Appendix

## Long Term Mating Orientation Scale [1] – Spanish Version

Indica tu grado de acuerdo o desacuerdo con cada una de las siguientes afirmaciones, en base a la siguiente escala de respuesta:

1 = Totalmente en desacuerdo    2 = En desacuerdo    3 = Moderadamente en desacuerdo    4 = Ni de acuerdo ni en desacuerdo    5 = Moderadamente de acuerdo    6 = De acuerdo    7 = Totalmente de acuerdo

|                                                                                                     |   |   |   |   |   |   |   |
|-----------------------------------------------------------------------------------------------------|---|---|---|---|---|---|---|
| 1. Me interesa tener una relación romántica a largo plazo con alguien especial.                     | 1 | 2 | 3 | 4 | 5 | 6 | 7 |
| 2. Espero tener una relación romántica que dure el resto de mi vida.                                | 1 | 2 | 3 | 4 | 5 | 6 | 7 |
| 3. Me gustaría tener una relación romántica que dure para siempre.                                  | 1 | 2 | 3 | 4 | 5 | 6 | 7 |
| 4. Las relaciones románticas a largo plazo no son para mí.                                          | 1 | 2 | 3 | 4 | 5 | 6 | 7 |
| 5. Encontrar una pareja para una relación romántica a largo plazo no es importante para mí.         | 1 | 2 | 3 | 4 | 5 | 6 | 7 |
| 6. Puedo imaginarme fácilmente empezando una relación romántica a largo plazo con alguien especial. | 1 | 2 | 3 | 4 | 5 | 6 | 7 |
| 7. Puedo imaginarme sentando la cabeza con alguien especial.                                        | 1 | 2 | 3 | 4 | 5 | 6 | 7 |

1. Jackson JJ, Kirkpatrick LA. The structure and measurement of human mating strategies: toward a multidimensional model of sociosexuality. *Evol Hum Behav.* 2007;28: 382–391. doi:10.1016/j.evolhumbehav.2007.04.005
